# Supplementary material for: Ammonia formation by a thiolate-bridged diiron amide complex as a nitrogenase mimic
Source: Springer Nature journal article supplement (doi:10.1038/nchem.1594), 2013-03-15
Supplement: 41557_2013_BFnchem1594_MOESM1_ESM.cif [file 41557_2013_BFnchem1594_MOESM1_ESM.cif]

 
data_r 
 
_audit_creation_method            SHELXL-97 
_chemical_name_systematic 
; 
 ? 
; 
_chemical_name_common             ? 
_chemical_melting_point           ? 
_chemical_formula_moiety          ? 
_chemical_formula_sum 
 'C26 H34 Fe2 S2' 
_chemical_formula_weight          522.35 
 
loop_ 
 _atom_type_symbol 
 _atom_type_description 
 _atom_type_scat_dispersion_real 
 _atom_type_scat_dispersion_imag 
 _atom_type_scat_source 
 'C'  'C'   0.0033   0.0016 
 'International Tables Vol C Tables 4.2.6.8 and 6.1.1.4' 
 'S'  'S'   0.1246   0.1234 
 'International Tables Vol C Tables 4.2.6.8 and 6.1.1.4' 
 'Fe'  'Fe'   0.3463   0.8444 
 'International Tables Vol C Tables 4.2.6.8 and 6.1.1.4' 
 'H'  'H'   0.0000   0.0000 
 'International Tables Vol C Tables 4.2.6.8 and 6.1.1.4' 
 
_symmetry_cell_setting            triclinic 
_symmetry_space_group_name_H-M    P-1 
 
loop_ 
 _symmetry_equiv_pos_as_xyz 
 'x, y, z' 
 '-x, -y, -z' 
 
_cell_length_a                    10.7880(3) 
_cell_length_b                    15.1458(5) 
_cell_length_c                    16.0306(6) 
_cell_angle_alpha                 85.671(2) 
_cell_angle_beta                  80.231(2) 
_cell_angle_gamma                 70.333(2) 
_cell_volume                      2430.25(14) 
_cell_formula_units_Z             4 
_cell_measurement_temperature     150(2) 
_cell_measurement_reflns_used     ? 
_cell_measurement_theta_min       ? 
_cell_measurement_theta_max       ? 
 
_exptl_crystal_description        ? 
_exptl_crystal_colour             ? 
_exptl_crystal_size_max           0.37 
_exptl_crystal_size_mid           0.28 
_exptl_crystal_size_min           0.26 
_exptl_crystal_density_meas       ? 
_exptl_crystal_density_diffrn     1.428 
_exptl_crystal_density_method     'not measured' 
_exptl_crystal_F_000              1096 
_exptl_absorpt_coefficient_mu     1.377 
_exptl_absorpt_correction_type    empirical 
_exptl_absorpt_correction_T_min   0.6298 
_exptl_absorpt_correction_T_max   0.7160 
_exptl_absorpt_process_details    SADABS 
 
_exptl_special_details 
; 
 ? 
; 
 
_diffrn_ambient_temperature       150(2) 
_diffrn_radiation_wavelength      0.71073 
_diffrn_radiation_type            MoK\a 
_diffrn_radiation_source          'fine-focus sealed tube' 
_diffrn_radiation_monochromator   graphite 
_diffrn_measurement_device_type   'CCD area detector' 
_diffrn_measurement_method        'phi and omega scans' 
_diffrn_detector_area_resol_mean  ? 
_diffrn_standards_number          ? 
_diffrn_standards_interval_count  ? 
_diffrn_standards_interval_time   ? 
_diffrn_standards_decay_%         ? 
_diffrn_reflns_number             22302 
_diffrn_reflns_av_R_equivalents   0.0295 
_diffrn_reflns_av_sigmaI/netI     0.0339 
_diffrn_reflns_limit_h_min        -12 
_diffrn_reflns_limit_h_max        12 
_diffrn_reflns_limit_k_min        -16 
_diffrn_reflns_limit_k_max        18 
_diffrn_reflns_limit_l_min        -19 
_diffrn_reflns_limit_l_max        19 
_diffrn_reflns_theta_min          1.94 
_diffrn_reflns_theta_max          25.00 
_reflns_number_total              8530 
_reflns_number_gt                 7542 
_reflns_threshold_expression      >2sigma(I) 
 
_computing_data_collection        'Bruker SMART' 
_computing_cell_refinement        'Bruker SMART' 
_computing_data_reduction         'Bruker SMART' 
_computing_structure_solution     'Bruker SHELXTL'
_computing_structure_refinement   'Bruker SHELXTL'
_computing_molecular_graphics     'Bruker SHELXTL' 
_computing_publication_material   'Bruker SHELXTL' 
 
_refine_special_details 
; 
 Refinement of F^2^ against ALL reflections.  The weighted R-factor wR and 
 goodness of fit S are based on F^2^, conventional R-factors R are based 
 on F, with F set to zero for negative F^2^. The threshold expression of 
 F^2^ > 2sigma(F^2^) is used only for calculating R-factors(gt) etc. and is 
 not relevant to the choice of reflections for refinement.  R-factors based 
 on F^2^ are statistically about twice as large as those based on F, and R- 
 factors based on ALL data will be even larger. 
; 
 
_refine_ls_structure_factor_coef  Fsqd  
_refine_ls_matrix_type            full 
_refine_ls_weighting_scheme       calc  
_refine_ls_weighting_details 
 'calc w=1/[\s^2^(Fo^2^)+(0.0361P)^2^+1.1016P] where P=(Fo^2^+2Fc^2^)/3' 
_atom_sites_solution_primary      direct 
_atom_sites_solution_secondary    difmap 
_atom_sites_solution_hydrogens    geom 
_refine_ls_hydrogen_treatment     'riding mode'
_refine_ls_extinction_method      none 
_refine_ls_extinction_coef        ? 
_refine_ls_number_reflns          8530 
_refine_ls_number_parameters      541 
_refine_ls_number_restraints      0 
_refine_ls_R_factor_all           0.0337 
_refine_ls_R_factor_gt            0.0286 
_refine_ls_wR_factor_ref          0.0745 
_refine_ls_wR_factor_gt           0.0722 
_refine_ls_goodness_of_fit_ref    1.049 
_refine_ls_restrained_S_all       1.049 
_refine_ls_shift/su_max           0.003 
_refine_ls_shift/su_mean          0.000 
 
loop_ 
 _atom_site_label 
 _atom_site_type_symbol 
 _atom_site_fract_x 
 _atom_site_fract_y 
 _atom_site_fract_z 
 _atom_site_U_iso_or_equiv 
 _atom_site_adp_type 
 _atom_site_occupancy 
 _atom_site_symmetry_multiplicity 
 _atom_site_calc_flag 
 _atom_site_refinement_flags 
 _atom_site_disorder_assembly 
 _atom_site_disorder_group 
Fe2 Fe 0.18824(3) 0.23700(2) 0.656341(19) 0.01727(8) Uani 1 1 d . . . 
Fe1 Fe 0.41741(3) 0.25373(2) 0.698208(19) 0.01809(8) Uani 1 1 d . . . 
Fe3 Fe 0.33990(3) 0.26682(2) 1.137998(19) 0.01782(8) Uani 1 1 d . . . 
Fe4 Fe 0.10747(3) 0.25035(2) 1.232797(19) 0.01824(8) Uani 1 1 d . . . 
S1 S 0.22129(5) 0.35480(4) 0.72213(4) 0.02291(12) Uani 1 1 d . . . 
S2 S 0.33935(5) 0.14157(4) 0.73703(4) 0.02299(12) Uani 1 1 d . . . 
S3 S 0.18840(5) 0.36088(4) 1.24063(4) 0.02263(12) Uani 1 1 d . . . 
S4 S 0.30319(5) 0.14799(4) 1.22602(4) 0.02230(12) Uani 1 1 d . . . 
C1 C 0.2358(2) 0.19152(16) 0.53256(14) 0.0233(5) Uani 1 1 d . . . 
C2 C 0.1656(2) 0.28986(16) 0.53545(14) 0.0266(5) Uani 1 1 d . . . 
C3 C 0.0385(2) 0.30401(16) 0.58624(15) 0.0277(5) Uani 1 1 d . . . 
C4 C 0.0307(2) 0.21426(17) 0.61446(14) 0.0261(5) Uani 1 1 d . . . 
C5 C 0.1525(2) 0.14512(16) 0.58265(14) 0.0237(5) Uani 1 1 d . . . 
C6 C 0.3669(2) 0.1436(2) 0.47989(16) 0.0376(6) Uani 1 1 d . . . 
H6A H 0.3526 0.1325 0.4247 0.056 Uiso 1 1 calc R . . 
H6B H 0.4103 0.0850 0.5065 0.056 Uiso 1 1 calc R . . 
H6C H 0.4218 0.1827 0.4747 0.056 Uiso 1 1 calc R . . 
C7 C 0.2134(3) 0.36503(19) 0.48997(18) 0.0429(7) Uani 1 1 d . . . 
H7A H 0.1885 0.3751 0.4344 0.064 Uiso 1 1 calc R . . 
H7B H 0.3086 0.3462 0.4853 0.064 Uiso 1 1 calc R . . 
H7C H 0.1738 0.4221 0.5210 0.064 Uiso 1 1 calc R . . 
C8 C -0.0701(3) 0.39628(19) 0.60437(19) 0.0466(7) Uani 1 1 d . . . 
H8A H -0.1261 0.4106 0.5612 0.070 Uiso 1 1 calc R . . 
H8B H -0.0313 0.4447 0.6050 0.070 Uiso 1 1 calc R . . 
H8C H -0.1223 0.3925 0.6585 0.070 Uiso 1 1 calc R . . 
C9 C -0.0897(2) 0.1960(2) 0.66358(17) 0.0407(7) Uani 1 1 d . . . 
H9A H -0.1443 0.1884 0.6251 0.061 Uiso 1 1 calc R . . 
H9B H -0.1397 0.2479 0.6996 0.061 Uiso 1 1 calc R . . 
H9C H -0.0621 0.1399 0.6975 0.061 Uiso 1 1 calc R . . 
C10 C 0.1861(3) 0.04098(17) 0.59504(17) 0.0385(6) Uani 1 1 d . . . 
H10A H 0.1578 0.0163 0.5510 0.058 Uiso 1 1 calc R . . 
H10B H 0.1415 0.0275 0.6491 0.058 Uiso 1 1 calc R . . 
H10C H 0.2807 0.0125 0.5929 0.058 Uiso 1 1 calc R . . 
C11 C 0.59533(19) 0.20740(15) 0.74184(14) 0.0228(5) Uani 1 1 d . . . 
C12 C 0.5442(2) 0.30740(16) 0.74166(15) 0.0246(5) Uani 1 1 d . . . 
C13 C 0.5308(2) 0.33978(16) 0.65674(15) 0.0257(5) Uani 1 1 d . . . 
C14 C 0.5749(2) 0.25978(16) 0.60417(14) 0.0238(5) Uani 1 1 d . . . 
C15 C 0.61321(19) 0.17777(15) 0.65667(14) 0.0219(5) Uani 1 1 d . . . 
C16 C 0.6289(2) 0.14594(18) 0.81747(15) 0.0329(6) Uani 1 1 d . . . 
H16A H 0.7200 0.1352 0.8232 0.049 Uiso 1 1 calc R . . 
H16B H 0.6166 0.0871 0.8108 0.049 Uiso 1 1 calc R . . 
H16C H 0.5716 0.1759 0.8672 0.049 Uiso 1 1 calc R . . 
C17 C 0.5150(2) 0.36789(19) 0.81738(17) 0.0379(6) Uani 1 1 d . . . 
H17A H 0.5928 0.3829 0.8229 0.057 Uiso 1 1 calc R . . 
H17B H 0.4903 0.3348 0.8674 0.057 Uiso 1 1 calc R . . 
H17C H 0.4430 0.4247 0.8102 0.057 Uiso 1 1 calc R . . 
C18 C 0.4859(3) 0.44031(17) 0.62638(19) 0.0419(7) Uani 1 1 d . . . 
H18A H 0.5617 0.4611 0.6114 0.063 Uiso 1 1 calc R . . 
H18B H 0.4246 0.4786 0.6706 0.063 Uiso 1 1 calc R . . 
H18C H 0.4427 0.4454 0.5777 0.063 Uiso 1 1 calc R . . 
C19 C 0.5966(2) 0.2627(2) 0.50969(15) 0.0366(6) Uani 1 1 d . . . 
H19A H 0.6843 0.2653 0.4892 0.055 Uiso 1 1 calc R . . 
H19B H 0.5315 0.3173 0.4900 0.055 Uiso 1 1 calc R . . 
H19C H 0.5880 0.2075 0.4892 0.055 Uiso 1 1 calc R . . 
C20 C 0.6689(2) 0.07871(16) 0.62631(17) 0.0331(6) Uani 1 1 d . . . 
H20A H 0.7638 0.0617 0.6109 0.050 Uiso 1 1 calc R . . 
H20B H 0.6302 0.0738 0.5779 0.050 Uiso 1 1 calc R . . 
H20C H 0.6483 0.0373 0.6707 0.050 Uiso 1 1 calc R . . 
C21 C 0.1169(2) 0.29397(17) 0.77695(14) 0.0259(5) Uani 1 1 d . . . 
C26 C -0.0170(2) 0.3396(2) 0.81562(16) 0.0348(6) Uani 1 1 d . . . 
H26A H -0.0556 0.4042 0.8092 0.042 Uiso 1 1 calc R . . 
C25 C -0.0875(2) 0.2893(2) 0.86146(16) 0.0428(7) Uani 1 1 d . . . 
H25A H -0.1738 0.3199 0.8878 0.051 Uiso 1 1 calc R . . 
C24 C -0.0326(3) 0.1908(2) 0.87007(16) 0.0443(7) Uani 1 1 d . . . 
H24A H -0.0828 0.1577 0.9026 0.053 Uiso 1 1 calc R . . 
C23 C 0.0930(2) 0.1437(2) 0.83135(15) 0.0340(6) Uani 1 1 d . . . 
H23A H 0.1268 0.0787 0.8354 0.041 Uiso 1 1 calc R . . 
C22 C 0.1723(2) 0.19498(16) 0.78466(14) 0.0239(5) Uani 1 1 d . . . 
C27 C 0.3655(2) 0.36180(16) 1.04279(14) 0.0257(5) Uani 1 1 d . . . 
C28 C 0.4915(2) 0.30082(16) 1.05988(14) 0.0247(5) Uani 1 1 d . . . 
C29 C 0.4988(2) 0.20653(16) 1.04601(14) 0.0251(5) Uani 1 1 d . . . 
C30 C 0.3771(2) 0.21042(16) 1.01922(14) 0.0268(5) Uani 1 1 d . . . 
C31 C 0.2950(2) 0.30633(16) 1.01684(14) 0.0257(5) Uani 1 1 d . . . 
C32 C 0.3160(3) 0.46666(17) 1.04666(18) 0.0404(6) Uani 1 1 d . . . 
H32A H 0.3428 0.4926 0.9929 0.061 Uiso 1 1 calc R . . 
H32B H 0.3529 0.4859 1.0897 0.061 Uiso 1 1 calc R . . 
H32C H 0.2206 0.4887 1.0599 0.061 Uiso 1 1 calc R . . 
C33 C 0.6012(2) 0.32957(19) 1.08250(16) 0.0344(6) Uani 1 1 d . . . 
H33A H 0.6558 0.3406 1.0317 0.052 Uiso 1 1 calc R . . 
H33B H 0.6545 0.2806 1.1157 0.052 Uiso 1 1 calc R . . 
H33C H 0.5636 0.3860 1.1146 0.052 Uiso 1 1 calc R . . 
C34 C 0.6165(2) 0.12043(18) 1.05461(17) 0.0385(6) Uani 1 1 d . . . 
H34A H 0.6752 0.1085 1.0015 0.058 Uiso 1 1 calc R . . 
H34B H 0.5864 0.0678 1.0706 0.058 Uiso 1 1 calc R . . 
H34C H 0.6631 0.1299 1.0973 0.058 Uiso 1 1 calc R . . 
C35 C 0.3453(3) 0.12816(18) 0.99468(17) 0.0394(6) Uani 1 1 d . . . 
H35A H 0.3741 0.1180 0.9351 0.059 Uiso 1 1 calc R . . 
H35B H 0.2509 0.1403 1.0074 0.059 Uiso 1 1 calc R . . 
H35C H 0.3904 0.0734 1.0258 0.059 Uiso 1 1 calc R . . 
C36 C 0.1657(3) 0.3452(2) 0.98345(17) 0.0394(6) Uani 1 1 d . . . 
H36A H 0.1826 0.3554 0.9234 0.059 Uiso 1 1 calc R . . 
H36B H 0.1139 0.4036 1.0102 0.059 Uiso 1 1 calc R . . 
H36C H 0.1176 0.3016 0.9953 0.059 Uiso 1 1 calc R . . 
C37 C -0.0243(2) 0.20527(15) 1.31666(15) 0.0234(5) Uani 1 1 d . . . 
C38 C -0.0007(2) 0.15971(15) 1.23787(15) 0.0226(5) Uani 1 1 d . . . 
C39 C -0.0391(2) 0.22931(15) 1.17432(15) 0.0230(5) Uani 1 1 d . . . 
C40 C -0.0871(2) 0.31978(15) 1.21276(14) 0.0223(5) Uani 1 1 d . . . 
C41 C -0.0784(2) 0.30438(15) 1.30114(14) 0.0230(5) Uani 1 1 d . . . 
C42 C -0.0021(2) 0.15895(17) 1.40114(16) 0.0328(6) Uani 1 1 d . . . 
H42A H -0.0804 0.1450 1.4275 0.049 Uiso 1 1 calc R . . 
H42B H 0.0161 0.2002 1.4363 0.049 Uiso 1 1 calc R . . 
H42C H 0.0722 0.1019 1.3938 0.049 Uiso 1 1 calc R . . 
C43 C 0.0514(2) 0.05595(16) 1.22398(17) 0.0335(6) Uani 1 1 d . . . 
H43A H -0.0218 0.0323 1.2303 0.050 Uiso 1 1 calc R . . 
H43B H 0.1087 0.0256 1.2648 0.050 Uiso 1 1 calc R . . 
H43C H 0.1008 0.0436 1.1679 0.050 Uiso 1 1 calc R . . 
C44 C -0.0413(2) 0.20890(18) 1.08508(16) 0.0329(6) Uani 1 1 d . . . 
H44A H -0.1260 0.2034 1.0806 0.049 Uiso 1 1 calc R . . 
H44B H 0.0282 0.1512 1.0687 0.049 Uiso 1 1 calc R . . 
H44C H -0.0274 0.2590 1.0485 0.049 Uiso 1 1 calc R . . 
C45 C -0.1445(2) 0.41243(16) 1.16967(17) 0.0331(6) Uani 1 1 d . . . 
H45A H -0.2381 0.4253 1.1706 0.050 Uiso 1 1 calc R . . 
H45B H -0.1010 0.4105 1.1121 0.050 Uiso 1 1 calc R . . 
H45C H -0.1311 0.4609 1.1987 0.050 Uiso 1 1 calc R . . 
C46 C -0.1196(2) 0.37870(17) 1.36663(16) 0.0324(6) Uani 1 1 d . . . 
H46A H -0.2120 0.3916 1.3893 0.049 Uiso 1 1 calc R . . 
H46B H -0.1062 0.4348 1.3411 0.049 Uiso 1 1 calc R . . 
H46C H -0.0669 0.3572 1.4114 0.049 Uiso 1 1 calc R . . 
C47 C 0.3554(2) 0.30525(16) 1.25790(14) 0.0236(5) Uani 1 1 d . . . 
C48 C 0.4362(2) 0.35508(19) 1.27971(15) 0.0319(6) Uani 1 1 d . . . 
H48A H 0.4033 0.4201 1.2830 0.038 Uiso 1 1 calc R . . 
C49 C 0.5622(3) 0.3070(2) 1.29581(16) 0.0390(6) Uani 1 1 d . . . 
H49A H 0.6136 0.3395 1.3116 0.047 Uiso 1 1 calc R . . 
C50 C 0.6150(2) 0.2088(2) 1.28877(16) 0.0378(6) Uani 1 1 d . . . 
H50A H 0.7010 0.1773 1.2999 0.045 Uiso 1 1 calc R . . 
C51 C 0.5416(2) 0.15923(18) 1.26585(15) 0.0305(5) Uani 1 1 d . . . 
H51A H 0.5785 0.0946 1.2601 0.037 Uiso 1 1 calc R . . 
C52 C 0.4092(2) 0.20640(16) 1.25078(14) 0.0236(5) Uani 1 1 d . . . 
 
loop_ 
 _atom_site_aniso_label 
 _atom_site_aniso_U_11 
 _atom_site_aniso_U_22 
 _atom_site_aniso_U_33 
 _atom_site_aniso_U_23 
 _atom_site_aniso_U_13 
 _atom_site_aniso_U_12 
Fe2 0.01693(15) 0.02035(16) 0.01597(16) -0.00118(12) -0.00279(12) -0.00774(12) 
Fe1 0.01497(14) 0.02070(16) 0.01978(17) -0.00182(12) -0.00219(12) -0.00732(12) 
Fe3 0.02032(15) 0.01897(15) 0.01594(17) -0.00028(12) -0.00189(12) -0.00923(12) 
Fe4 0.01721(15) 0.01935(15) 0.01980(17) -0.00016(12) -0.00295(12) -0.00818(12) 
S1 0.0194(2) 0.0208(3) 0.0286(3) -0.0065(2) -0.0027(2) -0.0059(2) 
S2 0.0213(3) 0.0224(3) 0.0272(3) 0.0036(2) -0.0069(2) -0.0090(2) 
S3 0.0237(3) 0.0218(3) 0.0240(3) -0.0052(2) -0.0001(2) -0.0104(2) 
S4 0.0198(2) 0.0199(3) 0.0281(3) 0.0045(2) -0.0043(2) -0.0085(2) 
C1 0.0254(11) 0.0323(12) 0.0157(11) -0.0031(9) -0.0027(9) -0.0137(9) 
C2 0.0338(12) 0.0336(12) 0.0177(12) 0.0028(10) -0.0105(10) -0.0156(10) 
C3 0.0275(11) 0.0330(12) 0.0224(12) -0.0003(10) -0.0131(10) -0.0054(10) 
C4 0.0233(11) 0.0412(13) 0.0183(12) -0.0033(10) -0.0061(9) -0.0146(10) 
C5 0.0274(11) 0.0310(12) 0.0183(11) -0.0028(9) -0.0056(9) -0.0152(10) 
C6 0.0343(13) 0.0526(16) 0.0274(14) -0.0149(12) 0.0070(11) -0.0188(12) 
C7 0.0600(17) 0.0428(15) 0.0344(16) 0.0135(12) -0.0135(13) -0.0278(14) 
C8 0.0431(15) 0.0425(16) 0.0425(17) -0.0035(13) -0.0164(13) 0.0066(13) 
C9 0.0283(13) 0.0696(19) 0.0331(15) -0.0045(13) -0.0036(11) -0.0278(13) 
C10 0.0555(16) 0.0335(13) 0.0336(15) -0.0064(11) -0.0034(12) -0.0243(12) 
C11 0.0140(10) 0.0302(12) 0.0253(12) -0.0022(10) -0.0023(9) -0.0087(9) 
C12 0.0167(10) 0.0312(12) 0.0283(13) -0.0075(10) -0.0014(9) -0.0104(9) 
C13 0.0207(10) 0.0275(12) 0.0321(13) -0.0003(10) -0.0019(9) -0.0131(9) 
C14 0.0187(10) 0.0325(12) 0.0224(12) -0.0003(10) -0.0013(9) -0.0123(9) 
C15 0.0146(9) 0.0280(11) 0.0228(12) -0.0026(9) -0.0009(9) -0.0073(9) 
C16 0.0252(12) 0.0444(14) 0.0266(13) 0.0016(11) -0.0068(10) -0.0076(11) 
C17 0.0311(13) 0.0440(15) 0.0410(16) -0.0190(13) -0.0047(11) -0.0122(11) 
C18 0.0430(15) 0.0314(13) 0.0554(19) 0.0077(13) -0.0109(13) -0.0180(12) 
C19 0.0331(13) 0.0563(16) 0.0239(13) 0.0030(12) -0.0016(11) -0.0215(12) 
C20 0.0273(12) 0.0324(13) 0.0363(15) -0.0094(11) -0.0026(11) -0.0050(10) 
C21 0.0208(11) 0.0401(13) 0.0198(12) -0.0069(10) -0.0017(9) -0.0134(10) 
C26 0.0235(12) 0.0540(16) 0.0263(13) -0.0147(12) -0.0004(10) -0.0106(11) 
C25 0.0236(12) 0.082(2) 0.0253(14) -0.0125(14) 0.0030(10) -0.0214(13) 
C24 0.0389(15) 0.088(2) 0.0212(14) 0.0051(14) -0.0028(11) -0.0434(16) 
C23 0.0374(13) 0.0526(16) 0.0228(13) 0.0072(11) -0.0102(11) -0.0279(12) 
C22 0.0222(11) 0.0378(13) 0.0159(11) 0.0000(10) -0.0043(9) -0.0149(10) 
C27 0.0324(12) 0.0284(12) 0.0171(12) 0.0039(9) -0.0009(9) -0.0134(10) 
C28 0.0272(11) 0.0315(12) 0.0174(12) -0.0009(9) 0.0032(9) -0.0153(10) 
C29 0.0262(11) 0.0287(12) 0.0194(12) -0.0042(9) 0.0024(9) -0.0097(9) 
C30 0.0324(12) 0.0335(12) 0.0158(12) -0.0063(10) 0.0020(9) -0.0141(10) 
C31 0.0286(11) 0.0354(13) 0.0143(11) 0.0019(10) -0.0014(9) -0.0135(10) 
C32 0.0526(16) 0.0275(13) 0.0404(16) 0.0097(12) -0.0045(13) -0.0159(12) 
C33 0.0325(13) 0.0484(15) 0.0287(14) 0.0003(12) 0.0021(11) -0.0253(12) 
C34 0.0351(13) 0.0382(14) 0.0342(15) -0.0083(12) 0.0015(11) -0.0034(11) 
C35 0.0471(15) 0.0430(15) 0.0343(15) -0.0136(12) -0.0015(12) -0.0225(13) 
C36 0.0383(14) 0.0545(16) 0.0295(14) 0.0103(12) -0.0130(11) -0.0192(12) 
C37 0.0185(10) 0.0282(12) 0.0261(12) 0.0021(10) -0.0027(9) -0.0120(9) 
C38 0.0185(10) 0.0242(11) 0.0285(13) -0.0019(10) -0.0033(9) -0.0113(9) 
C39 0.0181(10) 0.0268(11) 0.0267(12) -0.0032(10) -0.0053(9) -0.0093(9) 
C40 0.0184(10) 0.0247(11) 0.0236(12) -0.0005(9) -0.0042(9) -0.0062(9) 
C41 0.0178(10) 0.0261(11) 0.0254(12) -0.0017(9) -0.0029(9) -0.0077(9) 
C42 0.0326(12) 0.0384(14) 0.0293(14) 0.0087(11) -0.0046(11) -0.0164(11) 
C43 0.0346(13) 0.0248(12) 0.0444(16) -0.0023(11) -0.0056(11) -0.0138(10) 
C44 0.0296(12) 0.0436(14) 0.0289(14) -0.0063(11) -0.0061(10) -0.0145(11) 
C45 0.0332(13) 0.0290(12) 0.0349(15) 0.0024(11) -0.0107(11) -0.0055(10) 
C46 0.0290(12) 0.0354(13) 0.0315(14) -0.0089(11) -0.0008(10) -0.0090(10) 
C47 0.0249(11) 0.0357(12) 0.0150(11) -0.0016(9) -0.0007(9) -0.0170(10) 
C48 0.0366(13) 0.0466(15) 0.0209(13) -0.0071(11) 0.0021(10) -0.0263(12) 
C49 0.0385(14) 0.0696(19) 0.0244(14) -0.0026(13) -0.0052(11) -0.0376(14) 
C50 0.0231(12) 0.0709(19) 0.0245(13) 0.0091(13) -0.0083(10) -0.0221(12) 
C51 0.0226(11) 0.0427(14) 0.0244(13) 0.0090(11) -0.0043(10) -0.0102(10) 
C52 0.0233(11) 0.0345(12) 0.0171(11) 0.0038(10) -0.0037(9) -0.0154(10) 
 
_geom_special_details 
; 
 All esds (except the esd in the dihedral angle between two l.s. planes) 
 are estimated using the full covariance matrix.  The cell esds are taken 
 into account individually in the estimation of esds in distances, angles 
 and torsion angles; correlations between esds in cell parameters are only 
 used when they are defined by crystal symmetry.  An approximate (isotropic) 
 treatment of cell esds is used for estimating esds involving l.s. planes. 
; 
 
loop_ 
 _geom_bond_atom_site_label_1 
 _geom_bond_atom_site_label_2 
 _geom_bond_distance 
 _geom_bond_site_symmetry_2 
 _geom_bond_publ_flag 
Fe2 C3 2.060(2) . ? 
Fe2 C5 2.061(2) . ? 
Fe2 C2 2.062(2) . ? 
Fe2 C4 2.068(2) . ? 
Fe2 C1 2.073(2) . ? 
Fe2 C21 2.092(2) . ? 
Fe2 C22 2.103(2) . ? 
Fe2 S1 2.2940(6) . ? 
Fe2 S2 2.2950(6) . ? 
Fe2 Fe1 2.7635(4) . ? 
Fe1 C11 2.035(2) . ? 
Fe1 C12 2.043(2) . ? 
Fe1 C15 2.057(2) . ? 
Fe1 C13 2.074(2) . ? 
Fe1 C14 2.093(2) . ? 
Fe1 S1 2.1447(6) . ? 
Fe1 S2 2.1466(6) . ? 
Fe3 C29 2.059(2) . ? 
Fe3 C27 2.066(2) . ? 
Fe3 C30 2.067(2) . ? 
Fe3 C28 2.070(2) . ? 
Fe3 C31 2.077(2) . ? 
Fe3 C47 2.099(2) . ? 
Fe3 C52 2.101(2) . ? 
Fe3 S3 2.2982(6) . ? 
Fe3 S4 2.3009(6) . ? 
Fe3 Fe4 2.7803(4) . ? 
Fe4 C37 2.040(2) . ? 
Fe4 C41 2.043(2) . ? 
Fe4 C38 2.070(2) . ? 
Fe4 C40 2.075(2) . ? 
Fe4 C39 2.090(2) . ? 
Fe4 S4 2.1489(6) . ? 
Fe4 S3 2.1527(6) . ? 
S1 C21 1.769(2) . ? 
S2 C22 1.769(2) . ? 
S3 C47 1.773(2) . ? 
S4 C52 1.771(2) . ? 
C1 C2 1.426(3) . ? 
C1 C5 1.429(3) . ? 
C1 C6 1.495(3) . ? 
C2 C3 1.428(3) . ? 
C2 C7 1.495(3) . ? 
C3 C4 1.425(3) . ? 
C3 C8 1.501(3) . ? 
C4 C5 1.418(3) . ? 
C4 C9 1.498(3) . ? 
C5 C10 1.500(3) . ? 
C6 H6A 0.9600 . ? 
C6 H6B 0.9600 . ? 
C6 H6C 0.9600 . ? 
C7 H7A 0.9600 . ? 
C7 H7B 0.9600 . ? 
C7 H7C 0.9600 . ? 
C8 H8A 0.9600 . ? 
C8 H8B 0.9600 . ? 
C8 H8C 0.9600 . ? 
C9 H9A 0.9600 . ? 
C9 H9B 0.9600 . ? 
C9 H9C 0.9600 . ? 
C10 H10A 0.9600 . ? 
C10 H10B 0.9600 . ? 
C10 H10C 0.9600 . ? 
C11 C12 1.427(3) . ? 
C11 C15 1.431(3) . ? 
C11 C16 1.490(3) . ? 
C12 C13 1.426(3) . ? 
C12 C17 1.502(3) . ? 
C13 C14 1.427(3) . ? 
C13 C18 1.504(3) . ? 
C14 C15 1.427(3) . ? 
C14 C19 1.492(3) . ? 
C15 C20 1.501(3) . ? 
C16 H16A 0.9600 . ? 
C16 H16B 0.9600 . ? 
C16 H16C 0.9600 . ? 
C17 H17A 0.9600 . ? 
C17 H17B 0.9600 . ? 
C17 H17C 0.9600 . ? 
C18 H18A 0.9600 . ? 
C18 H18B 0.9600 . ? 
C18 H18C 0.9600 . ? 
C19 H19A 0.9600 . ? 
C19 H19B 0.9600 . ? 
C19 H19C 0.9600 . ? 
C20 H20A 0.9600 . ? 
C20 H20B 0.9600 . ? 
C20 H20C 0.9600 . ? 
C21 C22 1.419(3) . ? 
C21 C26 1.427(3) . ? 
C26 C25 1.348(4) . ? 
C26 H26A 0.9300 . ? 
C25 C24 1.413(4) . ? 
C25 H25A 0.9300 . ? 
C24 C23 1.365(4) . ? 
C24 H24A 0.9300 . ? 
C23 C22 1.427(3) . ? 
C23 H23A 0.9300 . ? 
C27 C28 1.421(3) . ? 
C27 C31 1.431(3) . ? 
C27 C32 1.498(3) . ? 
C28 C29 1.436(3) . ? 
C28 C33 1.495(3) . ? 
C29 C30 1.431(3) . ? 
C29 C34 1.499(3) . ? 
C30 C31 1.426(3) . ? 
C30 C35 1.494(3) . ? 
C31 C36 1.494(3) . ? 
C32 H32A 0.9600 . ? 
C32 H32B 0.9600 . ? 
C32 H32C 0.9600 . ? 
C33 H33A 0.9600 . ? 
C33 H33B 0.9600 . ? 
C33 H33C 0.9600 . ? 
C34 H34A 0.9600 . ? 
C34 H34B 0.9600 . ? 
C34 H34C 0.9600 . ? 
C35 H35A 0.9600 . ? 
C35 H35B 0.9600 . ? 
C35 H35C 0.9600 . ? 
C36 H36A 0.9600 . ? 
C36 H36B 0.9600 . ? 
C36 H36C 0.9600 . ? 
C37 C38 1.429(3) . ? 
C37 C41 1.435(3) . ? 
C37 C42 1.496(3) . ? 
C38 C39 1.417(3) . ? 
C38 C43 1.500(3) . ? 
C39 C40 1.438(3) . ? 
C39 C44 1.492(3) . ? 
C40 C41 1.432(3) . ? 
C40 C45 1.498(3) . ? 
C41 C46 1.500(3) . ? 
C42 H42A 0.9600 . ? 
C42 H42B 0.9600 . ? 
C42 H42C 0.9600 . ? 
C43 H43A 0.9600 . ? 
C43 H43B 0.9600 . ? 
C43 H43C 0.9600 . ? 
C44 H44A 0.9600 . ? 
C44 H44B 0.9600 . ? 
C44 H44C 0.9600 . ? 
C45 H45A 0.9600 . ? 
C45 H45B 0.9600 . ? 
C45 H45C 0.9600 . ? 
C46 H46A 0.9600 . ? 
C46 H46B 0.9600 . ? 
C46 H46C 0.9600 . ? 
C47 C52 1.418(3) . ? 
C47 C48 1.428(3) . ? 
C48 C49 1.366(4) . ? 
C48 H48A 0.9300 . ? 
C49 C50 1.408(4) . ? 
C49 H49A 0.9300 . ? 
C50 C51 1.366(4) . ? 
C50 H50A 0.9300 . ? 
C51 C52 1.420(3) . ? 
C51 H51A 0.9300 . ? 
 
loop_ 
 _geom_angle_atom_site_label_1 
 _geom_angle_atom_site_label_2 
 _geom_angle_atom_site_label_3 
 _geom_angle 
 _geom_angle_site_symmetry_1 
 _geom_angle_site_symmetry_3 
 _geom_angle_publ_flag 
C3 Fe2 C5 68.02(9) . . ? 
C3 Fe2 C2 40.55(9) . . ? 
C5 Fe2 C2 68.06(9) . . ? 
C3 Fe2 C4 40.39(9) . . ? 
C5 Fe2 C4 40.17(9) . . ? 
C2 Fe2 C4 67.86(9) . . ? 
C3 Fe2 C1 67.93(9) . . ? 
C5 Fe2 C1 40.45(9) . . ? 
C2 Fe2 C1 40.34(9) . . ? 
C4 Fe2 C1 67.62(9) . . ? 
C3 Fe2 C21 104.71(9) . . ? 
C5 Fe2 C21 137.78(9) . . ? 
C2 Fe2 C21 133.77(9) . . ? 
C4 Fe2 C21 106.87(8) . . ? 
C1 Fe2 C21 172.64(9) . . ? 
C3 Fe2 C22 128.77(9) . . ? 
C5 Fe2 C22 111.31(9) . . ? 
C2 Fe2 C22 169.24(9) . . ? 
C4 Fe2 C22 104.39(9) . . ? 
C1 Fe2 C22 145.12(9) . . ? 
C21 Fe2 C22 39.55(9) . . ? 
C3 Fe2 S1 105.04(7) . . ? 
C5 Fe2 S1 171.56(7) . . ? 
C2 Fe2 S1 103.58(7) . . ? 
C4 Fe2 S1 136.72(7) . . ? 
C1 Fe2 S1 133.33(6) . . ? 
C21 Fe2 S1 47.30(6) . . ? 
C22 Fe2 S1 76.66(6) . . ? 
C3 Fe2 S2 169.97(7) . . ? 
C5 Fe2 S2 103.95(6) . . ? 
C2 Fe2 S2 143.50(7) . . ? 
C4 Fe2 S2 129.57(7) . . ? 
C1 Fe2 S2 110.28(6) . . ? 
C21 Fe2 S2 76.92(6) . . ? 
C22 Fe2 S2 47.19(6) . . ? 
S1 Fe2 S2 83.44(2) . . ? 
C3 Fe2 Fe1 140.77(7) . . ? 
C5 Fe2 Fe1 133.55(6) . . ? 
C2 Fe2 Fe1 109.40(6) . . ? 
C4 Fe2 Fe1 173.51(6) . . ? 
C1 Fe2 Fe1 106.37(6) . . ? 
C21 Fe2 Fe1 79.34(6) . . ? 
C22 Fe2 Fe1 79.08(6) . . ? 
S1 Fe2 Fe1 49.112(15) . . ? 
S2 Fe2 Fe1 49.152(16) . . ? 
C11 Fe1 C12 40.96(9) . . ? 
C11 Fe1 C15 40.93(9) . . ? 
C12 Fe1 C15 68.61(8) . . ? 
C11 Fe1 C13 68.40(9) . . ? 
C12 Fe1 C13 40.51(9) . . ? 
C15 Fe1 C13 68.04(9) . . ? 
C11 Fe1 C14 68.00(9) . . ? 
C12 Fe1 C14 67.76(9) . . ? 
C15 Fe1 C14 40.21(9) . . ? 
C13 Fe1 C14 40.03(9) . . ? 
C11 Fe1 S1 142.11(7) . . ? 
C12 Fe1 S1 107.45(6) . . ? 
C15 Fe1 S1 167.78(7) . . ? 
C13 Fe1 S1 101.23(6) . . ? 
C14 Fe1 S1 127.65(6) . . ? 
C11 Fe1 S2 101.99(7) . . ? 
C12 Fe1 S2 135.31(7) . . ? 
C15 Fe1 S2 100.05(6) . . ? 
C13 Fe1 S2 168.03(6) . . ? 
C14 Fe1 S2 130.69(6) . . ? 
S1 Fe1 S2 90.74(2) . . ? 
C11 Fe1 Fe2 155.24(6) . . ? 
C12 Fe1 Fe2 161.38(6) . . ? 
C15 Fe1 Fe2 129.25(6) . . ? 
C13 Fe1 Fe2 134.39(7) . . ? 
C14 Fe1 Fe2 120.89(6) . . ? 
S1 Fe1 Fe2 53.957(16) . . ? 
S2 Fe1 Fe2 53.975(17) . . ? 
C29 Fe3 C27 68.08(9) . . ? 
C29 Fe3 C30 40.59(9) . . ? 
C27 Fe3 C30 67.97(9) . . ? 
C29 Fe3 C28 40.70(9) . . ? 
C27 Fe3 C28 40.19(9) . . ? 
C30 Fe3 C28 68.13(9) . . ? 
C29 Fe3 C31 67.95(9) . . ? 
C27 Fe3 C31 40.41(9) . . ? 
C30 Fe3 C31 40.25(9) . . ? 
C28 Fe3 C31 67.77(9) . . ? 
C29 Fe3 C47 124.94(9) . . ? 
C27 Fe3 C47 113.47(9) . . ? 
C30 Fe3 C47 165.01(9) . . ? 
C28 Fe3 C47 102.86(9) . . ? 
C31 Fe3 C47 149.06(9) . . ? 
C29 Fe3 C52 103.24(9) . . ? 
C27 Fe3 C52 141.57(9) . . ? 
C30 Fe3 C52 130.21(9) . . ? 
C28 Fe3 C52 108.62(9) . . ? 
C31 Fe3 C52 170.28(9) . . ? 
C47 Fe3 C52 39.46(9) . . ? 
C29 Fe3 S3 165.89(7) . . ? 
C27 Fe3 S3 102.86(6) . . ? 
C30 Fe3 S3 147.68(7) . . ? 
C28 Fe3 S3 125.55(6) . . ? 
C31 Fe3 S3 112.73(6) . . ? 
C47 Fe3 S3 47.30(6) . . ? 
C52 Fe3 S3 76.84(6) . . ? 
C29 Fe3 S4 107.45(7) . . ? 
C27 Fe3 S4 170.05(7) . . ? 
C30 Fe3 S4 102.70(7) . . ? 
C28 Fe3 S4 141.00(7) . . ? 
C31 Fe3 S4 129.98(7) . . ? 
C47 Fe3 S4 76.45(6) . . ? 
C52 Fe3 S4 47.17(6) . . ? 
S3 Fe3 S4 83.14(2) . . ? 
C29 Fe3 Fe4 145.07(6) . . ? 
C27 Fe3 Fe4 130.02(6) . . ? 
C30 Fe3 Fe4 111.95(6) . . ? 
C28 Fe3 Fe4 170.05(7) . . ? 
C31 Fe3 Fe4 105.51(6) . . ? 
C47 Fe3 Fe4 79.06(6) . . ? 
C52 Fe3 Fe4 79.18(6) . . ? 
S3 Fe3 Fe4 49.036(15) . . ? 
S4 Fe3 Fe4 48.925(15) . . ? 
C37 Fe4 C41 41.15(9) . . ? 
C37 Fe4 C38 40.68(9) . . ? 
C41 Fe4 C38 68.39(9) . . ? 
C37 Fe4 C40 68.73(9) . . ? 
C41 Fe4 C40 40.69(9) . . ? 
C38 Fe4 C40 67.96(8) . . ? 
C37 Fe4 C39 67.92(9) . . ? 
C41 Fe4 C39 67.96(9) . . ? 
C38 Fe4 C39 39.83(9) . . ? 
C40 Fe4 C39 40.38(8) . . ? 
C37 Fe4 S4 109.69(6) . . ? 
C41 Fe4 S4 147.39(7) . . ? 
C38 Fe4 S4 98.53(6) . . ? 
C40 Fe4 S4 161.63(6) . . ? 
C39 Fe4 S4 121.38(6) . . ? 
C37 Fe4 S3 131.07(7) . . ? 
C41 Fe4 S3 101.36(6) . . ? 
C38 Fe4 S3 169.75(6) . . ? 
C40 Fe4 S3 104.38(6) . . ? 
C39 Fe4 S3 137.38(6) . . ? 
S4 Fe4 S3 90.38(2) . . ? 
C37 Fe4 Fe3 163.28(6) . . ? 
C41 Fe4 Fe3 152.87(6) . . ? 
C38 Fe4 Fe3 136.23(6) . . ? 
C40 Fe4 Fe3 127.64(6) . . ? 
C39 Fe4 Fe3 121.01(6) . . ? 
S4 Fe4 Fe3 53.820(16) . . ? 
S3 Fe4 Fe3 53.726(17) . . ? 
C21 S1 Fe1 106.40(8) . . ? 
C21 S1 Fe2 60.33(7) . . ? 
Fe1 S1 Fe2 76.931(19) . . ? 
C22 S2 Fe1 106.21(8) . . ? 
C22 S2 Fe2 60.69(7) . . ? 
Fe1 S2 Fe2 76.87(2) . . ? 
C47 S3 Fe4 106.29(8) . . ? 
C47 S3 Fe3 60.43(7) . . ? 
Fe4 S3 Fe3 77.24(2) . . ? 
C52 S4 Fe4 106.79(8) . . ? 
C52 S4 Fe3 60.47(7) . . ? 
Fe4 S4 Fe3 77.25(2) . . ? 
C2 C1 C5 107.81(19) . . ? 
C2 C1 C6 126.7(2) . . ? 
C5 C1 C6 125.2(2) . . ? 
C2 C1 Fe2 69.40(12) . . ? 
C5 C1 Fe2 69.30(12) . . ? 
C6 C1 Fe2 131.41(16) . . ? 
C1 C2 C3 108.0(2) . . ? 
C1 C2 C7 126.2(2) . . ? 
C3 C2 C7 125.7(2) . . ? 
C1 C2 Fe2 70.26(13) . . ? 
C3 C2 Fe2 69.66(13) . . ? 
C7 C2 Fe2 127.92(17) . . ? 
C4 C3 C2 107.8(2) . . ? 
C4 C3 C8 125.7(2) . . ? 
C2 C3 C8 126.5(2) . . ? 
C4 C3 Fe2 70.10(12) . . ? 
C2 C3 Fe2 69.80(12) . . ? 
C8 C3 Fe2 127.25(17) . . ? 
C5 C4 C3 108.32(19) . . ? 
C5 C4 C9 125.9(2) . . ? 
C3 C4 C9 125.6(2) . . ? 
C5 C4 Fe2 69.64(12) . . ? 
C3 C4 Fe2 69.50(12) . . ? 
C9 C4 Fe2 130.14(17) . . ? 
C4 C5 C1 108.06(19) . . ? 
C4 C5 C10 126.3(2) . . ? 
C1 C5 C10 125.5(2) . . ? 
C4 C5 Fe2 70.19(12) . . ? 
C1 C5 Fe2 70.25(12) . . ? 
C10 C5 Fe2 127.65(17) . . ? 
C1 C6 H6A 109.5 . . ? 
C1 C6 H6B 109.5 . . ? 
H6A C6 H6B 109.5 . . ? 
C1 C6 H6C 109.5 . . ? 
H6A C6 H6C 109.5 . . ? 
H6B C6 H6C 109.5 . . ? 
C2 C7 H7A 109.5 . . ? 
C2 C7 H7B 109.5 . . ? 
H7A C7 H7B 109.5 . . ? 
C2 C7 H7C 109.5 . . ? 
H7A C7 H7C 109.5 . . ? 
H7B C7 H7C 109.5 . . ? 
C3 C8 H8A 109.5 . . ? 
C3 C8 H8B 109.5 . . ? 
H8A C8 H8B 109.5 . . ? 
C3 C8 H8C 109.5 . . ? 
H8A C8 H8C 109.5 . . ? 
H8B C8 H8C 109.5 . . ? 
C4 C9 H9A 109.5 . . ? 
C4 C9 H9B 109.5 . . ? 
H9A C9 H9B 109.5 . . ? 
C4 C9 H9C 109.5 . . ? 
H9A C9 H9C 109.5 . . ? 
H9B C9 H9C 109.5 . . ? 
C5 C10 H10A 109.5 . . ? 
C5 C10 H10B 109.5 . . ? 
H10A C10 H10B 109.5 . . ? 
C5 C10 H10C 109.5 . . ? 
H10A C10 H10C 109.5 . . ? 
H10B C10 H10C 109.5 . . ? 
C12 C11 C15 107.9(2) . . ? 
C12 C11 C16 125.4(2) . . ? 
C15 C11 C16 126.6(2) . . ? 
C12 C11 Fe1 69.84(12) . . ? 
C15 C11 Fe1 70.37(12) . . ? 
C16 C11 Fe1 127.22(15) . . ? 
C13 C12 C11 108.14(19) . . ? 
C13 C12 C17 126.1(2) . . ? 
C11 C12 C17 125.8(2) . . ? 
C13 C12 Fe1 70.92(12) . . ? 
C11 C12 Fe1 69.20(12) . . ? 
C17 C12 Fe1 127.33(15) . . ? 
C12 C13 C14 107.92(19) . . ? 
C12 C13 C18 126.5(2) . . ? 
C14 C13 C18 125.5(2) . . ? 
C12 C13 Fe1 68.57(12) . . ? 
C14 C13 Fe1 70.71(12) . . ? 
C18 C13 Fe1 128.91(16) . . ? 
C13 C14 C15 108.2(2) . . ? 
C13 C14 C19 125.1(2) . . ? 
C15 C14 C19 126.0(2) . . ? 
C13 C14 Fe1 69.27(12) . . ? 
C15 C14 Fe1 68.52(12) . . ? 
C19 C14 Fe1 134.92(16) . . ? 
C14 C15 C11 107.78(19) . . ? 
C14 C15 C20 125.5(2) . . ? 
C11 C15 C20 126.6(2) . . ? 
C14 C15 Fe1 71.27(12) . . ? 
C11 C15 Fe1 68.70(11) . . ? 
C20 C15 Fe1 127.87(15) . . ? 
C11 C16 H16A 109.5 . . ? 
C11 C16 H16B 109.5 . . ? 
H16A C16 H16B 109.5 . . ? 
C11 C16 H16C 109.5 . . ? 
H16A C16 H16C 109.5 . . ? 
H16B C16 H16C 109.5 . . ? 
C12 C17 H17A 109.5 . . ? 
C12 C17 H17B 109.5 . . ? 
H17A C17 H17B 109.5 . . ? 
C12 C17 H17C 109.5 . . ? 
H17A C17 H17C 109.5 . . ? 
H17B C17 H17C 109.5 . . ? 
C13 C18 H18A 109.5 . . ? 
C13 C18 H18B 109.5 . . ? 
H18A C18 H18B 109.5 . . ? 
C13 C18 H18C 109.5 . . ? 
H18A C18 H18C 109.5 . . ? 
H18B C18 H18C 109.5 . . ? 
C14 C19 H19A 109.5 . . ? 
C14 C19 H19B 109.5 . . ? 
H19A C19 H19B 109.5 . . ? 
C14 C19 H19C 109.5 . . ? 
H19A C19 H19C 109.5 . . ? 
H19B C19 H19C 109.5 . . ? 
C15 C20 H20A 109.5 . . ? 
C15 C20 H20B 109.5 . . ? 
H20A C20 H20B 109.5 . . ? 
C15 C20 H20C 109.5 . . ? 
H20A C20 H20C 109.5 . . ? 
H20B C20 H20C 109.5 . . ? 
C22 C21 C26 119.2(2) . . ? 
C22 C21 S1 117.44(16) . . ? 
C26 C21 S1 123.35(19) . . ? 
C22 C21 Fe2 70.65(12) . . ? 
C26 C21 Fe2 129.41(16) . . ? 
S1 C21 Fe2 72.36(8) . . ? 
C25 C26 C21 120.0(3) . . ? 
C25 C26 H26A 120.0 . . ? 
C21 C26 H26A 120.0 . . ? 
C26 C25 C24 121.1(2) . . ? 
C26 C25 H25A 119.5 . . ? 
C24 C25 H25A 119.5 . . ? 
C23 C24 C25 120.9(2) . . ? 
C23 C24 H24A 119.5 . . ? 
C25 C24 H24A 119.5 . . ? 
C24 C23 C22 119.6(3) . . ? 
C24 C23 H23A 120.2 . . ? 
C22 C23 H23A 120.2 . . ? 
C21 C22 C23 119.1(2) . . ? 
C21 C22 S2 117.59(16) . . ? 
C23 C22 S2 123.25(19) . . ? 
C21 C22 Fe2 69.80(13) . . ? 
C23 C22 Fe2 130.08(16) . . ? 
S2 C22 Fe2 72.12(8) . . ? 
C28 C27 C31 108.33(19) . . ? 
C28 C27 C32 126.5(2) . . ? 
C31 C27 C32 125.1(2) . . ? 
C28 C27 Fe3 70.04(12) . . ? 
C31 C27 Fe3 70.21(12) . . ? 
C32 C27 Fe3 127.80(17) . . ? 
C27 C28 C29 107.87(19) . . ? 
C27 C28 C33 126.3(2) . . ? 
C29 C28 C33 125.7(2) . . ? 
C27 C28 Fe3 69.77(12) . . ? 
C29 C28 Fe3 69.26(12) . . ? 
C33 C28 Fe3 129.57(16) . . ? 
C30 C29 C28 107.84(19) . . ? 
C30 C29 C34 126.7(2) . . ? 
C28 C29 C34 125.4(2) . . ? 
C30 C29 Fe3 70.00(12) . . ? 
C28 C29 Fe3 70.04(12) . . ? 
C34 C29 Fe3 127.49(17) . . ? 
C31 C30 C29 108.0(2) . . ? 
C31 C30 C35 126.4(2) . . ? 
C29 C30 C35 125.5(2) . . ? 
C31 C30 Fe3 70.25(12) . . ? 
C29 C30 Fe3 69.42(12) . . ? 
C35 C30 Fe3 127.84(17) . . ? 
C30 C31 C27 107.94(19) . . ? 
C30 C31 C36 127.0(2) . . ? 
C27 C31 C36 124.7(2) . . ? 
C30 C31 Fe3 69.49(13) . . ? 
C27 C31 Fe3 69.38(12) . . ? 
C36 C31 Fe3 132.19(17) . . ? 
C27 C32 H32A 109.5 . . ? 
C27 C32 H32B 109.5 . . ? 
H32A C32 H32B 109.5 . . ? 
C27 C32 H32C 109.5 . . ? 
H32A C32 H32C 109.5 . . ? 
H32B C32 H32C 109.5 . . ? 
C28 C33 H33A 109.5 . . ? 
C28 C33 H33B 109.5 . . ? 
H33A C33 H33B 109.5 . . ? 
C28 C33 H33C 109.5 . . ? 
H33A C33 H33C 109.5 . . ? 
H33B C33 H33C 109.5 . . ? 
C29 C34 H34A 109.5 . . ? 
C29 C34 H34B 109.5 . . ? 
H34A C34 H34B 109.5 . . ? 
C29 C34 H34C 109.5 . . ? 
H34A C34 H34C 109.5 . . ? 
H34B C34 H34C 109.5 . . ? 
C30 C35 H35A 109.5 . . ? 
C30 C35 H35B 109.5 . . ? 
H35A C35 H35B 109.5 . . ? 
C30 C35 H35C 109.5 . . ? 
H35A C35 H35C 109.5 . . ? 
H35B C35 H35C 109.5 . . ? 
C31 C36 H36A 109.5 . . ? 
C31 C36 H36B 109.5 . . ? 
H36A C36 H36B 109.5 . . ? 
C31 C36 H36C 109.5 . . ? 
H36A C36 H36C 109.5 . . ? 
H36B C36 H36C 109.5 . . ? 
C38 C37 C41 107.67(19) . . ? 
C38 C37 C42 126.7(2) . . ? 
C41 C37 C42 125.6(2) . . ? 
C38 C37 Fe4 70.79(12) . . ? 
C41 C37 Fe4 69.56(12) . . ? 
C42 C37 Fe4 126.79(15) . . ? 
C39 C38 C37 108.36(19) . . ? 
C39 C38 C43 125.1(2) . . ? 
C37 C38 C43 126.5(2) . . ? 
C39 C38 Fe4 70.86(12) . . ? 
C37 C38 Fe4 68.54(12) . . ? 
C43 C38 Fe4 127.85(15) . . ? 
C38 C39 C40 108.5(2) . . ? 
C38 C39 C44 124.3(2) . . ? 
C40 C39 C44 126.9(2) . . ? 
C38 C39 Fe4 69.32(12) . . ? 
C40 C39 Fe4 69.27(12) . . ? 
C44 C39 Fe4 132.03(16) . . ? 
C41 C40 C39 107.23(19) . . ? 
C41 C40 C45 126.3(2) . . ? 
C39 C40 C45 126.4(2) . . ? 
C41 C40 Fe4 68.45(11) . . ? 
C39 C40 Fe4 70.35(12) . . ? 
C45 C40 Fe4 129.49(16) . . ? 
C40 C41 C37 108.24(19) . . ? 
C40 C41 C46 126.1(2) . . ? 
C37 C41 C46 125.7(2) . . ? 
C40 C41 Fe4 70.86(12) . . ? 
C37 C41 Fe4 69.29(12) . . ? 
C46 C41 Fe4 125.94(15) . . ? 
C37 C42 H42A 109.5 . . ? 
C37 C42 H42B 109.5 . . ? 
H42A C42 H42B 109.5 . . ? 
C37 C42 H42C 109.5 . . ? 
H42A C42 H42C 109.5 . . ? 
H42B C42 H42C 109.5 . . ? 
C38 C43 H43A 109.5 . . ? 
C38 C43 H43B 109.5 . . ? 
H43A C43 H43B 109.5 . . ? 
C38 C43 H43C 109.5 . . ? 
H43A C43 H43C 109.5 . . ? 
H43B C43 H43C 109.5 . . ? 
C39 C44 H44A 109.5 . . ? 
C39 C44 H44B 109.5 . . ? 
H44A C44 H44B 109.5 . . ? 
C39 C44 H44C 109.5 . . ? 
H44A C44 H44C 109.5 . . ? 
H44B C44 H44C 109.5 . . ? 
C40 C45 H45A 109.5 . . ? 
C40 C45 H45B 109.5 . . ? 
H45A C45 H45B 109.5 . . ? 
C40 C45 H45C 109.5 . . ? 
H45A C45 H45C 109.5 . . ? 
H45B C45 H45C 109.5 . . ? 
C41 C46 H46A 109.5 . . ? 
C41 C46 H46B 109.5 . . ? 
H46A C46 H46B 109.5 . . ? 
C41 C46 H46C 109.5 . . ? 
H46A C46 H46C 109.5 . . ? 
H46B C46 H46C 109.5 . . ? 
C52 C47 C48 119.1(2) . . ? 
C52 C47 S3 117.77(16) . . ? 
C48 C47 S3 123.13(18) . . ? 
C52 C47 Fe3 70.35(13) . . ? 
C48 C47 Fe3 129.09(16) . . ? 
S3 C47 Fe3 72.27(8) . . ? 
C49 C48 C47 119.8(2) . . ? 
C49 C48 H48A 120.1 . . ? 
C47 C48 H48A 120.1 . . ? 
C48 C49 C50 120.8(2) . . ? 
C48 C49 H49A 119.6 . . ? 
C50 C49 H49A 119.6 . . ? 
C51 C50 C49 120.8(2) . . ? 
C51 C50 H50A 119.6 . . ? 
C49 C50 H50A 119.6 . . ? 
C50 C51 C52 120.0(2) . . ? 
C50 C51 H51A 120.0 . . ? 
C52 C51 H51A 120.0 . . ? 
C47 C52 C51 119.4(2) . . ? 
C47 C52 S4 117.15(16) . . ? 
C51 C52 S4 123.46(18) . . ? 
C47 C52 Fe3 70.20(13) . . ? 
C51 C52 Fe3 129.41(16) . . ? 
S4 C52 Fe3 72.36(8) . . ? 
 
_diffrn_measured_fraction_theta_max    0.998 
_diffrn_reflns_theta_full              25.00 
_diffrn_measured_fraction_theta_full   0.998 
_refine_diff_density_max    0.527 
_refine_diff_density_min   -0.352 
_refine_diff_density_rms    0.071 
