# Supplementary material for: Ammonia formation by a thiolate-bridged diiron amide complex as a nitrogenase mimic
Source: Springer Nature journal article supplement (doi:10.1038/nchem.1594), 2013-03-15
Supplement: 41557_2013_BFnchem1594_MOESM7_ESM.mol [file 41557_2013_BFnchem1594_MOESM7_ESM.mol]

  ChemDraw02201305222D

 34 31  0  0  0  0  0  0  0  0999 V2000
   -0.2932    2.4895    0.0000 C   0  0  0  0  0  0  0  0  0  0  0  0
   -0.7096    1.7773    0.0000 C   0  0  0  0  0  0  0  0  0  0  0  0
   -0.3011    1.0606    0.0000 C   0  0  0  0  0  0  0  0  0  0  0  0
    0.5239    1.0560    0.0000 C   0  0  0  0  0  0  0  0  0  0  0  0
    0.9403    1.7682    0.0000 C   0  0  0  0  0  0  0  0  0  0  0  0
    0.5318    2.4850    0.0000 C   0  0  0  0  0  0  0  0  0  0  0  0
   -0.7161    0.3508    0.0000 S   0  5  0  0  0  0  0  0  0  0  0  0
    0.9311    0.3417    0.0000 S   0  5  0  0  0  0  0  0  0  0  0  0
   -1.2204   -0.5965    0.0000 Fe  0  2  0  0  0  0  0  0  0  0  0  0
    1.0787   -0.5750    0.0000 Fe  0  2  0  0  0  0  0  0  0  0  0  0
    3.2449    0.0821    0.0000 C   0  0  0  0  0  0  0  0  0  0  0  0
    2.4643   -0.1849    0.0000 C   0  0  0  0  0  0  0  0  0  0  0  0
    2.4770   -1.0098    0.0000 C   0  0  0  0  0  0  0  0  0  0  0  0
    3.2655   -1.2526    0.0000 C   0  0  0  0  0  0  0  0  0  0  0  0
    3.7400   -0.5778    0.0000 C   0  5  0  0  0  0  0  0  0  0  0  0
    1.7917    0.2881    0.0000 C   0  0  0  0  0  0  0  0  0  0  0  0
    3.4869    0.8679    0.0000 C   0  0  0  0  0  0  0  0  0  0  0  0
    4.5622   -0.5651    0.0000 C   0  0  0  0  0  0  0  0  0  0  0  0
    3.5316   -2.0306    0.0000 C   0  0  0  0  0  0  0  0  0  0  0  0
    1.8193   -1.5033    0.0000 C   0  0  0  0  0  0  0  0  0  0  0  0
   -3.2449    0.0085    0.0000 C   0  0  0  0  0  0  0  0  0  0  0  0
   -2.4643   -0.2585    0.0000 C   0  0  0  0  0  0  0  0  0  0  0  0
   -2.4770   -1.0834    0.0000 C   0  0  0  0  0  0  0  0  0  0  0  0
   -3.2655   -1.3263    0.0000 C   0  0  0  0  0  0  0  0  0  0  0  0
   -3.7400   -0.6514    0.0000 C   0  5  0  0  0  0  0  0  0  0  0  0
   -1.7917    0.2145    0.0000 C   0  0  0  0  0  0  0  0  0  0  0  0
   -3.4869    0.7943    0.0000 C   0  0  0  0  0  0  0  0  0  0  0  0
   -4.5622   -0.6388    0.0000 C   0  0  0  0  0  0  0  0  0  0  0  0
   -3.5316   -2.1042    0.0000 C   0  0  0  0  0  0  0  0  0  0  0  0
   -1.8193   -1.5769    0.0000 C   0  0  0  0  0  0  0  0  0  0  0  0
   -0.1333   -1.7731    0.0000 N   0  0  0  0  0  0  0  0  0  0  0  0
    0.6917   -1.7677    0.0000 N   0  0  0  0  0  0  0  0  0  0  0  0
    1.1129   -2.4739    0.0000 C   0  0  0  0  0  0  0  0  0  0  0  0
   -0.5368   -2.4895    0.0000 H   0  0  0  0  0  0  0  0  0  0  0  0
  1  2  2  0      
  2  3  1  0      
  3  4  2  0      
  4  5  1  0      
  5  6  2  0      
  6  1  1  0      
  3  7  1  0      
  4  8  1  0      
 11 12  2  0      
 12 13  1  0      
 13 14  2  0      
 14 15  1  0      
 15 11  1  0      
 12 16  1  0      
 11 17  1  0      
 15 18  1  0      
 14 19  1  0      
 13 20  1  0      
 21 22  2  0      
 22 23  1  0      
 23 24  2  0      
 24 25  1  0      
 25 21  1  0      
 22 26  1  0      
 21 27  1  0      
 25 28  1  0      
 24 29  1  0      
 23 30  1  0      
 31 32  2  0      
 32 33  1  0      
 31 34  1  0      
M  CHG  6   7  -1   8  -1   9   2  10   2  15  -1  25  -1
M  END
